# Supplementary material for: The Impact of Pre-Slaughter Fasting on the Ruminal Microbial Population of Commercial Angus Steers
Source: MDPI journal article supplement (doi:10.3390/microorganisms9122625), 2021-12-19
Supplement: s1 [file s1]

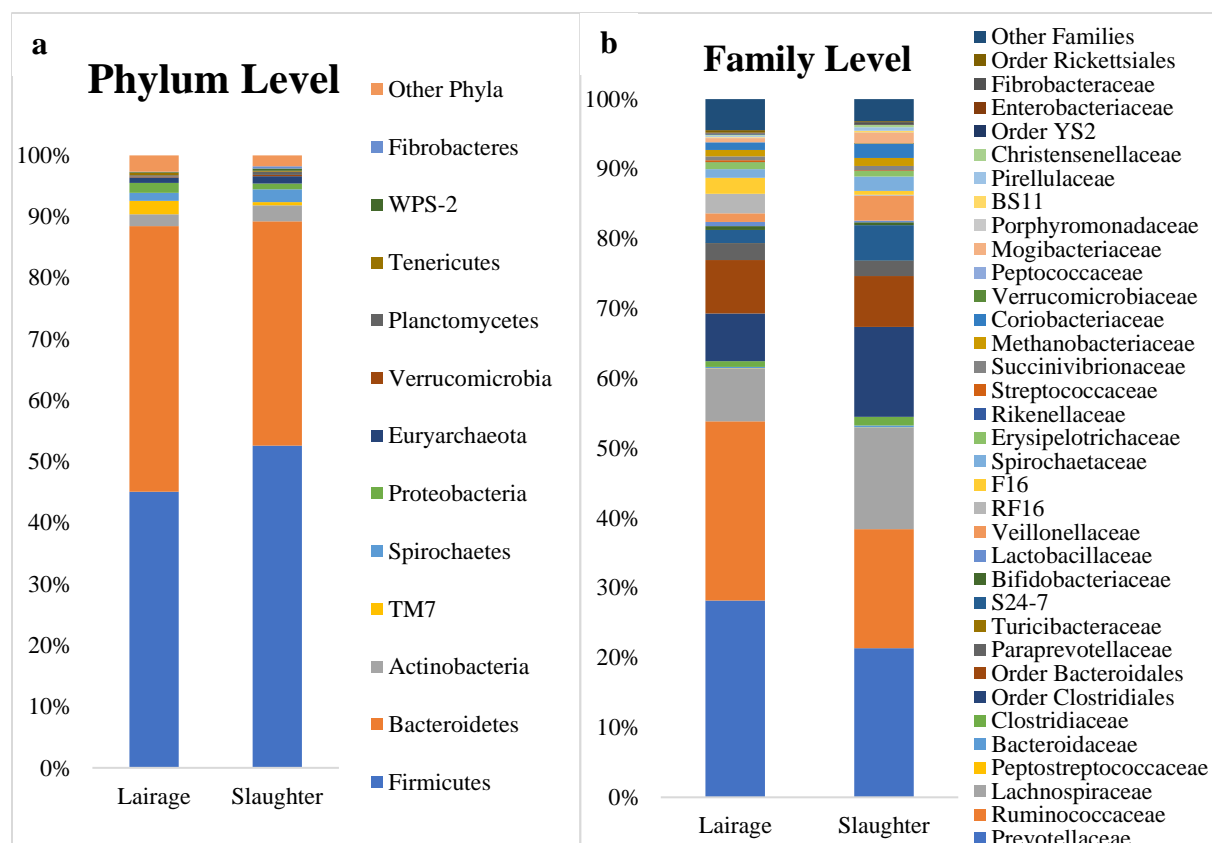

**Supplemental Figure S1.** Taxonomic profiles at the phylum (a) and family (b) levels of the relative bacterial abundance of the rumen at lairage and slaughter of Angus steers (n=15).
